# Supplementary material for: Technical note: An assessment of the performance of statistical bias correction techniques for global chemistry-climate model surface ozone fields
Source: Copernicus journal article supplement (doi:10.5194/egusphere-2023-2743), 2023-11-23
Supplement: Supplementary file [file egusphere-2023-2743-AC1-supplement.pdf]

We thank two anonymous reviewers for their constructive comments. Below we provide a point by point response (*blue, italics*) to the individual reviewer comments (black).

### **Reviewer 1:**

This is an interesting study on different bias-correction methods applied to CMIP6 Earth System Models (ESMs) surface-ozone results. The analysis explores the performance of each applied statistical bias-correction method, to what extent this is sensitive to each individual ESM, and finally the nature and origin of the errors. The manuscript is well organized with qualitative and efficient presentation of the results. Yet, there are some points that need clarification and further investigation. I believe the study may be a valuable addition to the literature once the following comments are addressed.

*We thank the reviewer for the positive assessment of our manuscript and the valuable comments provided that helped strengthen our study. Please find our point by point response to the individual comments below.*

### **Main Comments**

1. More information on the gridded observational ozone dataset (used here for the evaluation) is needed. Do the authors use the Schnell et al. (2014) data? This assessment is for the 2000-2009 period. Is this an extension of this dataset? Is this dataset publicly available? Please describe (briefly) in the manuscript how this dataset was constructed. Is the inhomogeneous network of observations over Europe and USA affecting the results of your evaluation and how? This should be discussed. I suggest including a subsection in the Data & Methods Section about the gridded observational ozone data and relevant information.

*We thank the reviewer for this comment. We use an updated and extended version of the data set presented in Schnell et al. (2014). The data set comprises surface ozone observations from monitoring networks in Europe and the US. Precisely, for the US the data set is based on the EPA's Air Quality System (AQS) and Clean Air Status and Trends Network (CASTNET), and Environment Canada's National Air Pollution Surveillance Program (NAPS), while for Europe the data set combines the EMEP and the European Environment Agency's AirBase network (excluding stations designated as traffic). Records from EMEP and AirBase are reported as  $\mu\text{g m}^{-3}$  and are converted to parts per billion ( $\text{ppb} = 10^{-9} \text{ mol mol}^{-1} = \text{nmol mol}^{-1}$ ) using a temperature of 20 °C. The gridded product is created following the procedures described in Section 2 of Schnell et al. (2014). We have included the following additional text in the revised manuscript:*

*"We also obtain observed MDA8  $\text{O}_3$  with a spatial resolution of  $1^\circ \times 1^\circ$  per grid cell for both the European and the US domain using an extended dataset constructed using the methods of Schnell et al. [2014; 2015] and Schnell and Prather [2017], one which was designed specifically to compare against gridded CCMs. The dataset is constructed using an inverse distance weighted interpolation method that includes a declustering component similar to kriging; i.e., clustered (within 100 km) observations' weights are reduced such that those stations (often located around urban centers) are not disproportionately used in the interpolation. For the US domain, point based observations that are used in the interpolation include the US EPA's Air Quality System (AQS), the US EPA Clean Air Status and*

*Trends Network (CASTNET), and Environment Canada's National Air Pollution Surveillance Program (NAPS); for the European Domain we include the EMEP and European Environment Agency's AirBase network (excluding stations designated as traffic). The exponent for the distance component is 2.5 and a maximum distance of 500 km is used for the weights. Parameters were estimated using a leave-N-out cross-validation technique. Estimations are made at 25 equally spaced points within each 1° x 1° cell and trapezoidally averaged. Other recent work has used this extended dataset [e.g., Ducker et al., 2018; Garrido-Perez et al., 2019, Guo et al, 2018]. Schnell et al. [2014] estimated an RMSE of 6-9 ppb for individual stations and 0-3 ppb for the grid cell averages; Ducker et al. [2018] estimated a mean bias of 5-10 ppb with the updated dataset over their study locations. For the analysis here the interpolation is performed on hourly abundances and the MDA8 O<sub>3</sub> is estimated using the interpolated hourly fields. Note, we apply the nomenclature of the European Union for the calculation of the MDA8 O<sub>3</sub> values in both domains, i.e. the eight hour average for a given hour is derived using the data of that specific hour and the preceding seven hours [EUR-LEX, 2008]. For convenience, the data is provided along with this article, see data statement below. To allow for an optimal comparison, the model data is regridded using an ordinary inverse distance weighting algorithm to match the spatial extent of the observations.”*

2. To explore the error sources, the authors select the daily maximum temperature and radiation for sensitivities to meteorology. Yet, wind and especially for high-ozone events stability (stagnation) are also important drivers. How are these two represented by the individual ensemble members? Attributing model error mainly to precursors emissions needs more evidence. What are the NO<sub>x</sub> and VOC PDFs for the ensemble members? Are there any model diagnostics for ozone production (PO<sub>3</sub>) and loss (PO<sub>3</sub>) to support this?

*We thank the reviewer for this comment. Following the reviewer's suggestion we have included additional meteorological and chemical variables available from the CESM2-WACCM6 simulations in the analysis. These are daily mean wind speed, monthly mean concentrations of NO<sub>2</sub>, NO and HCHO (as VOC proxy). We detail this expanded analysis now in our manuscript in the revised section 3.4. We agree with the reviewer that ozone production and ozone loss would be useful terms, however those are unfortunately not available (as not archived) for the ensemble but only a single ensemble member. Therefore, these metrics could not be included in the analysis here.*

3. It would be interesting to see results for MDA8 O<sub>3</sub> using a different gridded observational ozone dataset (if available). Moreover, since the ultimate purpose of the study is to support reliability of ozone-health studies, the recent Global Burden of Disease (GBD) report (2019) applies the ozone season daily maximum 8 hour mixing ratio (OSDMA8) metric to estimate excess mortality from long-term ozone exposure. Gridded observational OSDMA8 data, as described in DeLang et al. (2021), are publicly available at <https://zenodo.org/records/8320001>. Are the statistical methods used here applicable for a long-term effect ozone metric like OSMDA8?

*Following the reviewer's suggestion we have expanded the analysis towards OSDMA8. To this end we have computed OSDMA8 from our data set following the method described in DeLang et al. (2021).*

*Our results show a varying OSDMA8 bias across CCMs for the periods 2005-2009 and 2010-2014 (see Figure R1). This is in agreement with the bias in MDA8 O<sub>3</sub> we report on. As for MDA8 O<sub>3</sub>, after applying individual correction techniques the bias is substantially reduced (see Figures R2 and R3). For OSDMA8*

however, the individual bias correction techniques (despite all being able to substantially reduce the bias) show no pronounced difference in performance. We attribute this to properties of the OSDMA8 metric itself, which represents the annual maximum value of the running 6-month average of monthly mean MDA8  $O_3$ , i.e., a single value per calendar year. Given the long-term averaging time span considered for the OSDMA metric we do expect also no major difference among techniques explored here. More illustrative for the performance of the correction techniques across the full range of the ozone burden is the evaluation of the residual bias in the MDA8  $O_3$  distribution function explored in Fig. S5 and S8 in our original manuscript. Therefore, for clarity and focus of the present study we prefer to restrict the analysis to MDA8  $O_3$ .

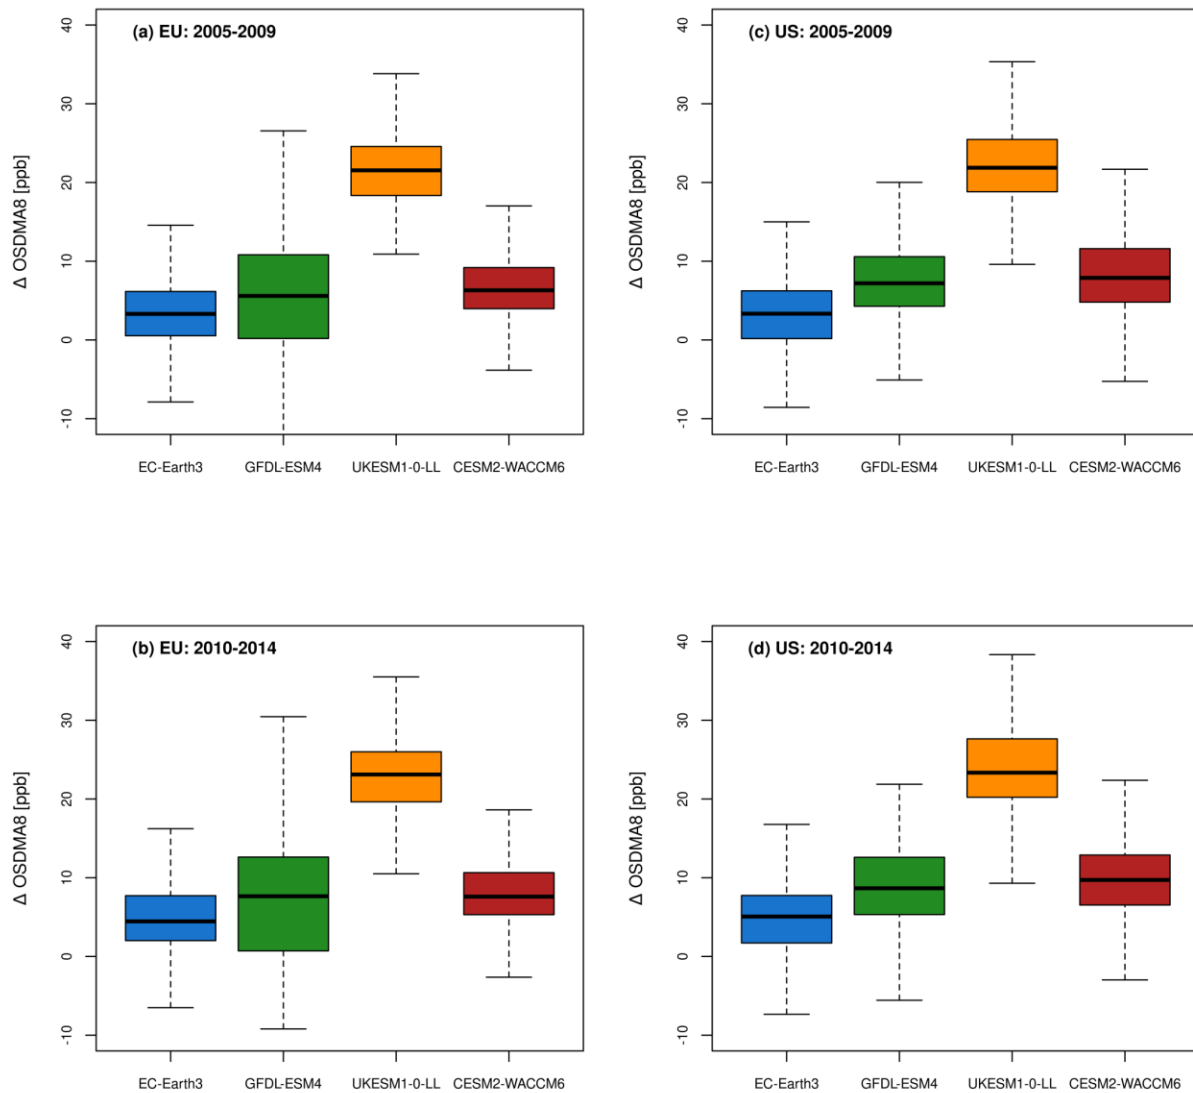

Fig. R1: Boxplots of the residual bias in OSDMA8 pooled across grid cells in the individual CCMs in 2005-2009 and 2010-2014 for the EU (a,b) and US domain (c,d).

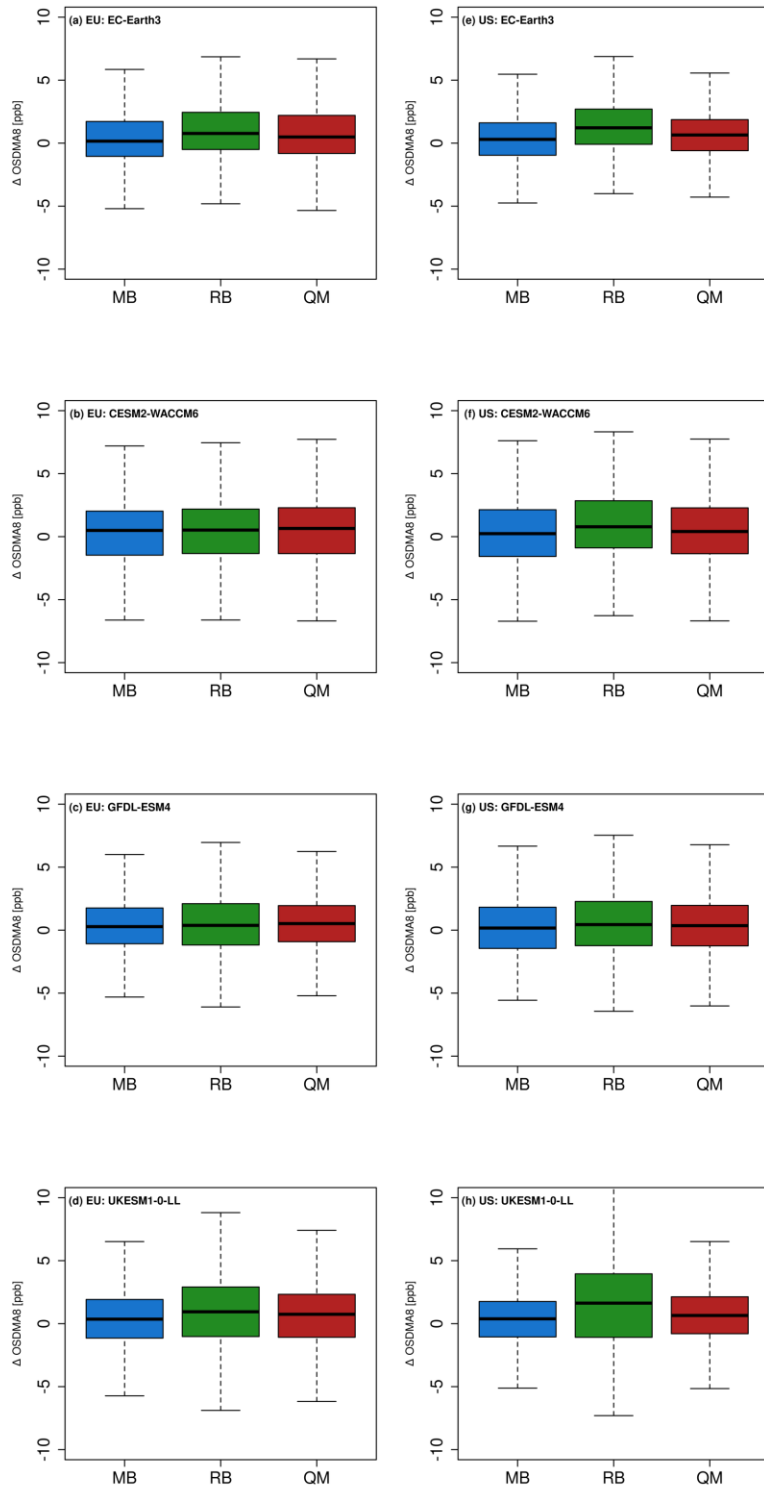

*Fig. R2: Boxplots of the residual bias in OSDMA pooled across grid cells for individually bias corrected CCMs in 2005-2009 for the EU (a,b,c,d) and US domain (e,f,g,h). Blue, Green and red colour indicate the MB, RB and QM correction methods respectively.*

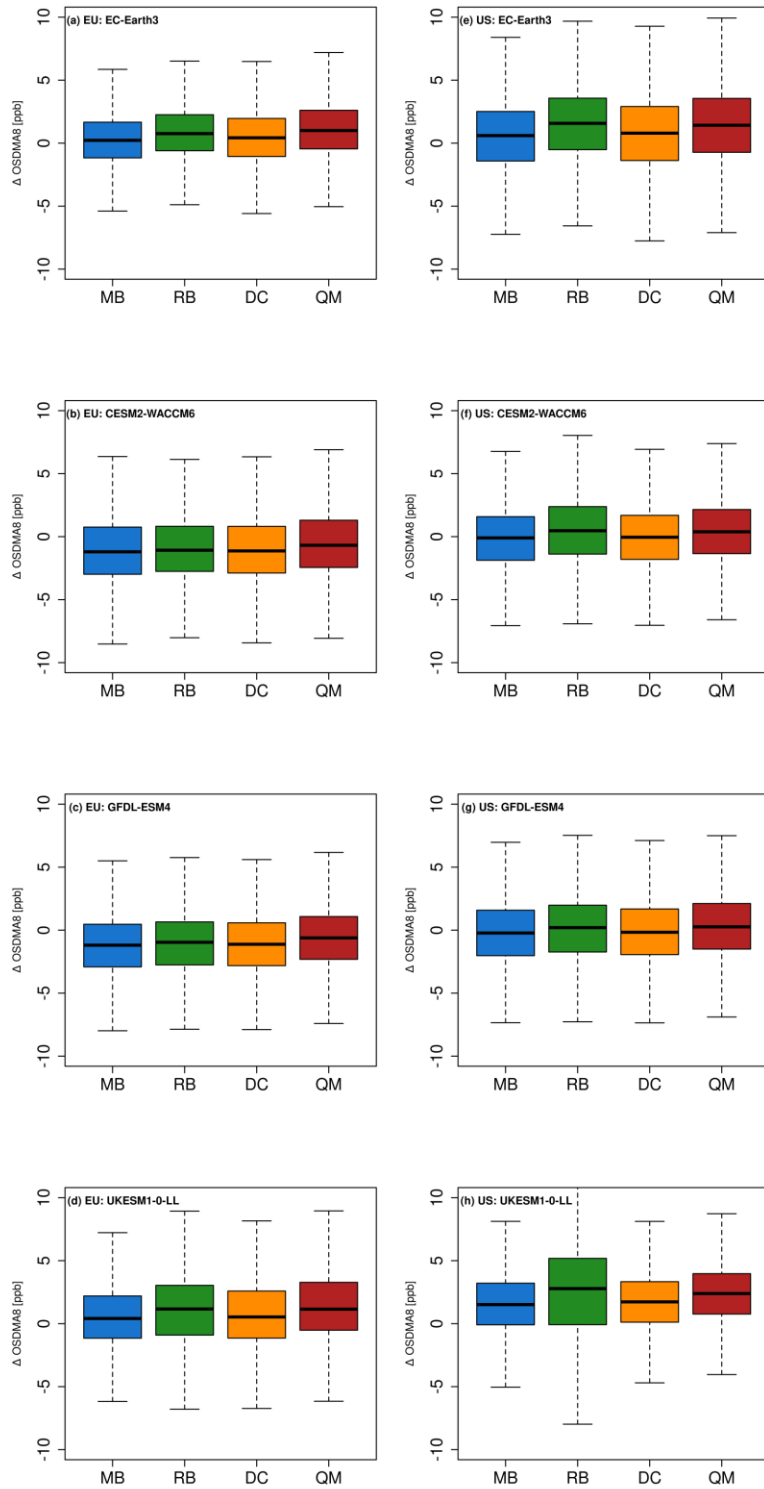

Fig. R3: as Fig. R2 but for 2010-2014.

## Comments

L18-19: This is a strong statement as this is not explicitly shown from the results. See also main comment #2.

*Following the suggestion of the referee, we have included further available meteorological and chemical covariates in the analysis. These show all strong uniformity across the CESM2-WACCM6 ensemble, confirming our original postulated hypothesis. However, as we agree with the referee that we cannot show the root cause of model bias in full explicitness, and only have a large ensemble for one global model available, we further have included a limiting qualifier in this abstract statement: "Ensemble simulations available for one CCM indicate that model ozone biases are likely more sensitive to the process representation embedded in chemical mechanisms or emissions rather than to meteorology."*

L21-26: Tropospheric and therefore surface ozone has also a natural source, the transport from the stratosphere (Stohl et al., 2003) which over specific regions (Lin et al., 2015) or occasionally (Akritidis et al., 2010) contributes significantly.

*Thank you for this comment. We have updated the introduction section respectively.*

L26: "O<sub>3</sub> is associated with a variety of detrimental human health effects". I suggest including here a couple of recent references on ozone effects on human health like Murray et al. (2020) and Pozzer et al. (2023).

*Thank you for this comment. We have included several references regarding health effects of ozone.*

L40: maybe "meteorology and deposition"

*Thank you, done.*

L65-66: Please clarify why only the first member of the ensemble is used in the main study.

*We have included the clarification in the revised manuscript. Please see also our response to comment 4 of Reviewer 2.*

L68: The period 1993 to 2014 is referred here. Are there any data used in the analysis except from the 2005-2009 and 2010-2014 periods? Please clarify.

*No observational data beyond 2005-2014 has been used in our study. Note, we have overall revised section 2.1 following the comments provided by both referees.*

L183: Remove t.

*Thank you for spotting this typo.*

L285-286: As this is not explicitly shown to be related with precursors emissions but rather assumed I suggest rephrasing accordingly.

*We have revised this sentence accordingly.*

L360:  $E_B$  depends

*Thank you, done.*

L361:  $E_B$  is

*Thank you, done.*

L363: “the strong base period performance”, maybe “the strong performance for the base period”?

*We have revised this sentence accordingly.*

## **References**

Akritidis D., P. Zanis, I. Pytharoulis, A. Mavrakis and Th. Karacostas,: A deep stratospheric intrusion event down to the earth’s surface of the megacity of Athens, *Meteorology and Atmospheric Physics*, 109 (1-2), 9-18, DOI: 10.1007/s00703-010-0096-6, 2010

DeLang MN, Becker JS, Chang KL, Serre ML, Cooper OR, Schultz MG, et al. Mapping Yearly Fine Resolution Global Surface Ozone through the Bayesian Maximum Entropy Data Fusion of Observations and Model Output for 1990–2017. *Environ Sci Technol* [Internet]. 2021 Apr 20;55(8):4389–98. Available from: <https://doi.org/10.1021/acs.est.0c07742>

Lin, M., Fiore, A., Horowitz, L. et al. Climate variability modulates western US ozone air quality in spring via deep stratospheric intrusions. *Nat Commun* 6, 7105 (2015). <https://doi.org/10.1038/ncomms8105>

Murray CJL, Aravkin AY, Zheng P, Abbafati C, Abbas KM, Abbasi-Kangevari M, et al. Global burden of 87 risk factors in 204 countries and territories, 1990–2019: a systematic analysis for the Global Burden of Disease Study 2019. *The Lancet* [Internet]. 2020;396(10258):1223–49. Available from: <https://www.sciencedirect.com/science/article/pii/S0140673620307522>

Pozzer A, Anenberg SC, Dey S, Haines A, Lelieveld J, Chowdhury S. Mortality Attributable to Ambient Air Pollution: A Review of Global Estimates. *Geohealth* [Internet]. 2023;7(1):e2022GH000711. Available from: <https://agupubs.onlinelibrary.wiley.com/doi/abs/10.1029/2022GH000711>

Stohl, A., et al. (2003), Stratosphere-troposphere exchange: A review, and what we have learned from STACCATO, *J. Geophys. Res.*, 108, 8516, doi:10.1029/2002JD002490, D12.

*Thank you for providing these valuable references, we have included these and others in the revised version of our manuscript.*

## References added beyond those suggested by the referee

Ducker, J. A., C. D. Holmes, T. Keenan, S. Fares, A. Goldstein, I. Mammarella, W. Munger, and J. L. Schnell (2018), *Synthetic ozone deposition and stomatal uptake at flux tower sites*, *Biogeosci.*, 15, 5395-5413, <https://doi.org/10.5194/bg-15-5395-2018>.

EUR-LEX. (2008). *Directive 2008/50/EC of the European parliament and of the council of 21 May 2008 on ambient air quality and cleaner air for Europe (2008/50/EC)*. Retrieved from <https://eur-lex.europa.eu/legal-content/EN/TXT/?uri=CELEX:32008L0050>

Garrido-Perez, J. M., C. Ordóñez, R. García-Herrera, and J. L. Schnell (2019), *The differing impact of air stagnation on summer ozone across Europe*, *Atmos. Environ.*, 219, 117062, <https://doi.org/10.1016/j.atmosenv.2019.117062>.

Guo, J. A. M. Fiore, L. T. Murray, D. A. Jaffe, J. L. Schnell, T. Moore, and G. Milly (2018), *Average versus high surface ozone levels over the Continental U.S.A.: Model bias, background influences, and interannual variability*, *Atmos. Chem. Phys.*, 18, 12123-12140, <https://doi.org/10.5194/acp-18-12123-2018>.

Schnell, J. L., M. J. Prather, B. Josse, V. Naik, L. W. Horowitz, P. Cameron-Smith, D. Bergmann, G. Zeng, D. A. Plummer, K. Sudo, T. Nagashima, D. T. Shindell, G. Faluvegi, and S. A. Strode (2015), *Use of North American and European air quality networks to evaluate global chemistry-climate modeling of surface ozone*, *Atmos. Chem. Phys.*, 15(18), 10581-10596, <https://doi.org/10.5194/acp-15-10581-2015>

Schnell, J. L., Prather, M. J. (2017). *Co-occurrence of extremes in surface ozone, particulate matter, and temperature over eastern North America*. *Proceedings of the National Academy of Sciences*, 114(11), 2854-2859. <https://doi.org/10.1073/pnas.1614453114>

## **Reviewer 2:**

The study presents different bias correction methods for surface ozone and apply them to four CMIP6 generation Earth System Models (ESMs). The performance of each applied method is investigated along with the sensitivities of each individual ESM to these methods, and finally recommendations. The manuscript is well-organized and easy to follow. There are few points that need further clarification before it can be accepted in ACP.

*We thank the reviewer for the positive assessment of our manuscript and the valuable comments provided that helped strengthen our study. Please find our point by point response to the individual comments below.*

## **General comments**

1. More information is needed on the gridded observational ozone dataset, including how this dataset was generated briefly, referring to the observation networks in Europe and USA.



*Thank you for this comment. Following your comment and the comments of Ref #1 we have included the text below in the revised manuscript.*

*“We also obtain observed MDA8 O<sub>3</sub> with a spatial resolution of 1° x 1° per grid cell for both the European and the US domain using an extended dataset constructed using the methods of Schnell et al. [2014; 2015] and Schnell and Prather [2017], one which was designed specifically to compare against gridded CCMs. The dataset is constructed using an inverse distance weighted interpolation method that includes a declustering component similar to kriging; i.e., clustered (within 100 km) observations’ weights are reduced such that those stations (often located around urban centers) are not disproportionately used in the interpolation. For the US domain, point based observations that are used in the interpolation include the US EPA’s Air Quality System (AQS), the US EPA Clean Air Status and Trends Network (CASTNET), and Environment Canada’s National Air Pollution Surveillance Program (NAPS); for the European Domain we include the EMEP and European Environment Agency’s AirBase network (excluding stations designated as traffic). The exponent for the distance component is 2.5 and a maximum distance of 500 km is used for the weights. Parameters were estimated using a leave-N-out cross-validation technique. Estimations are made at 25 equally spaced points within each 1° x 1° cell and trapezoidally averaged. Other recent work has used this extended dataset [e.g., Ducker et al., 2018; Garrido-Perez et al., 2019, Guo et al, 2018]. Schnell et al. [2014] estimated an RMSE of 6-9 ppb for individual stations and 0-3 ppb for the grid cell averages; Ducker et al. [2018] estimated a mean bias of 5-10 ppb with the updated dataset over their study locations. For the analysis here the interpolation is performed on hourly abundances and the MDA8 O<sub>3</sub> is estimated using the interpolated hourly fields. Note, we apply the nomenclature of the European Union for the calculation of the MDA8 O<sub>3</sub> values in both domains, i.e. the eight hour average for a given hour is derived using the data of that specific hour and the preceding seven hours [EUR-LEX, 2008]. For convenience, the data is provided along with this article, see data statement below. To allow for an optimal comparison, the model data is regridded using an ordinary inverse distance weighting algorithm to match the spatial extent of the observations.”*

2. The dataset is divided into two for evaluation and projections. It would be useful to show if projections would give similar results if other datasets would be used, or the projections would be applied in other regions such as Asia. In addition, would the conclusions change if another metric was used to evaluate the performance.

*We agree with the reviewer that expanding to additional data sets or study regions would be of interest. However, we consider this beyond the scope of the present work. We have chosen to restrict the analysis here to the data product included here given that 1) to the best of our knowledge no other gridded observational data set for MDA8 O<sub>3</sub> is freely available for multiple other world regions and/or created across regions with a uniform methodological framework; and 2) no other consistent gridded data products for MDA8 O<sub>3</sub> are available for both the EU and the US.*

3. Daily maximum temperature and radiation are selected for sensitivity to meteorology. I would recommend looking at winds to account for transport. Is there a reason why it is not included? Another important source is stratospheric ozone, which should be discussed.

*We thank the reviewer for this comment. Following your and reviewer 1’s suggestion we have included additional variables, including information on mean wind speed, and also NO, NO<sub>2</sub> and HCHO in the*

*analysis focusing on meteorological vs. chemical driving of model biases. We detail this expanded analysis now in our manuscript in the revised section 3.4.*

4. Why did you only use the first member of the ensemble. This should be clarified and justified.

*In the main body of the manuscript we explicitly analyze only the first ensemble member, in analogy to the other CCMs, where also one ensemble member has been used (driven by inhomogeneous availability of members per model). In section 4.3, focusing on the chemical vs. meteorological driving of model bias we include the entire CESM2-WACCM6 ensemble, comprising 13 members. We provide this clarifying information in the revised manuscript.*
